# Supplementary material for: Synthesis of dibutyl-trimethylsilanylmethyl-amine and its application towards SO2 absorption with phase change behaviors
Source: Royal Society of Chemistry journal article supplement (doi:10.1039/d0nj04500d), 2020-01-01
Supplement: d0nj04500d1.pdf [file d0nj04500d1.pdf]

## Electronic supplementary information for:

### Synthesis of Dibutyl-trimethylsilanylmethyl-amine and Its Application Towards

#### SO<sub>2</sub> Absorption with Phase Change Behaviors

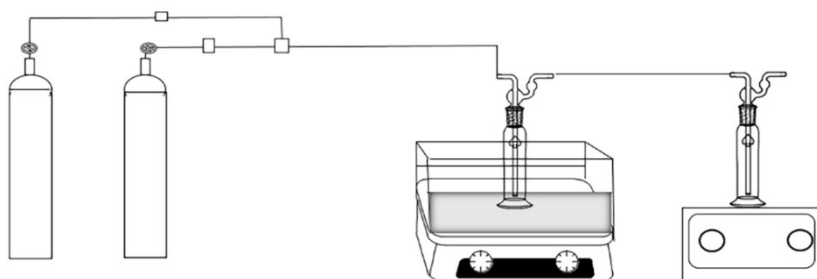

Figure S1. Schematic of platform for SO<sub>2</sub> absorption experiment.

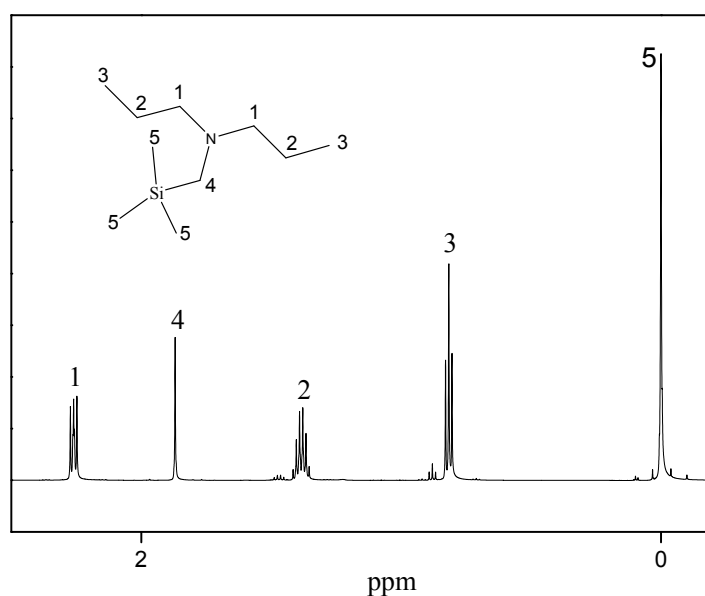

Figure S2. <sup>1</sup>H NMR (600 MHz, CDCl<sub>3</sub>) spectra for the synthesized dipropyl-trimethylsilanylmethyl-amine.

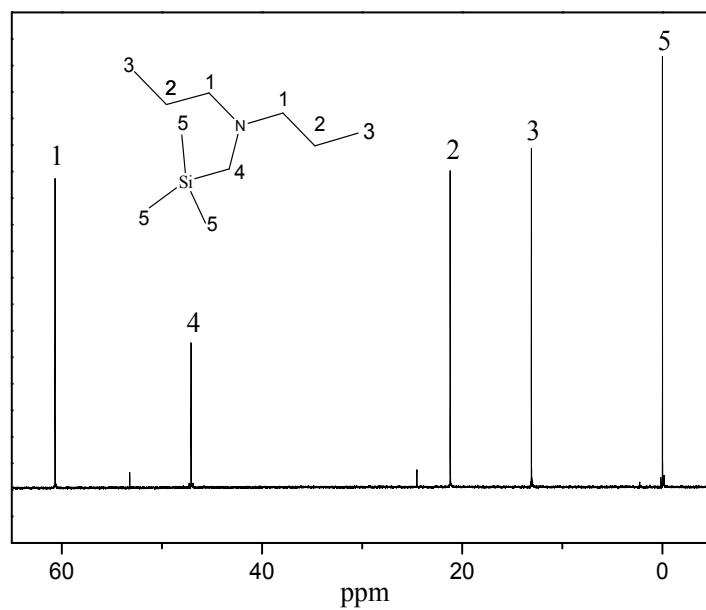

Figure S3.  $^{13}\text{C}$  NMR (600 MHz,  $\text{CDCl}_3$ ) spectra for the synthesized dipropyl-trimethylsilanylmethyl-amine.

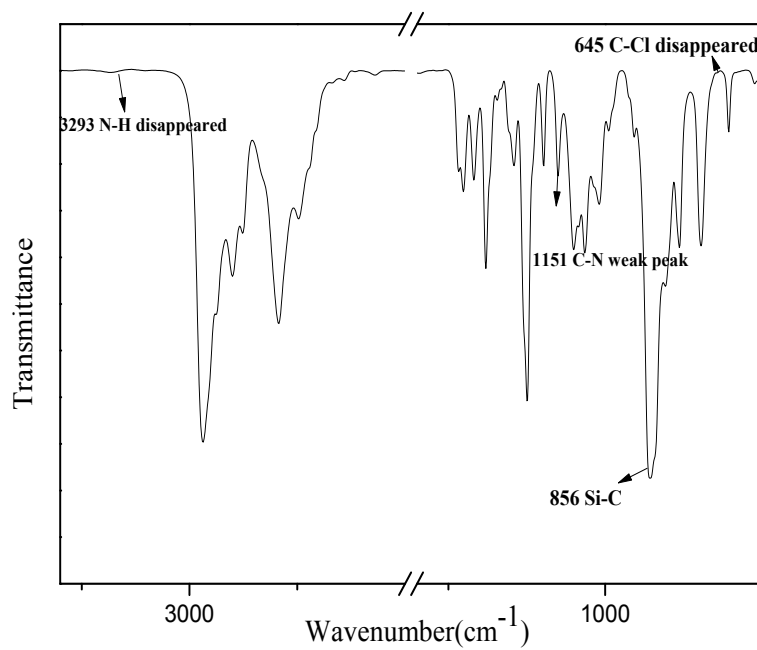

Figure S4. Infrared spectra for the synthesized diethyl-trimethylsilanylmethyl-amine.

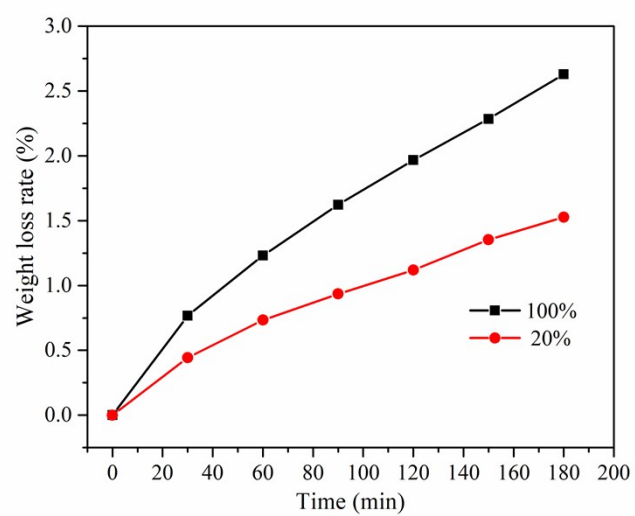

Figure S5. Effects of DT SMA concentration on the weight loss rate.

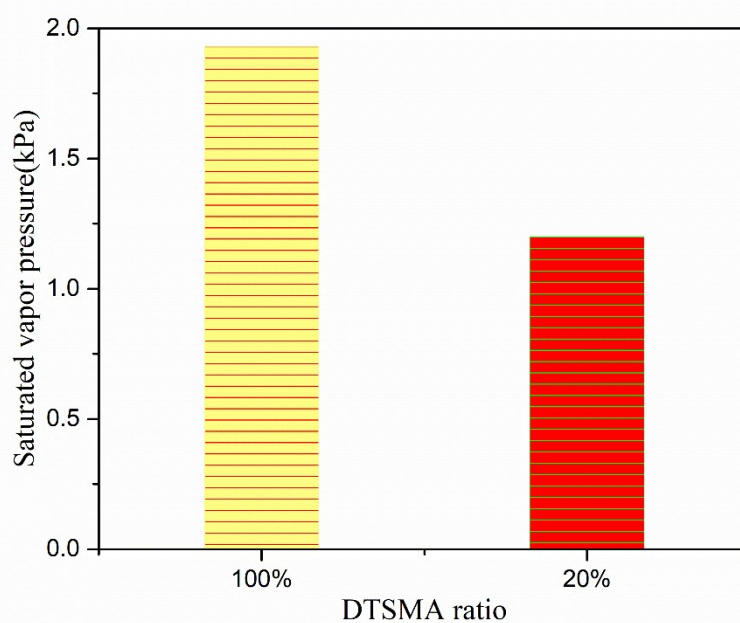

Figure S6. The saturated vapor pressure of the pure absorbent DT SMA and 20%DT SMA solution

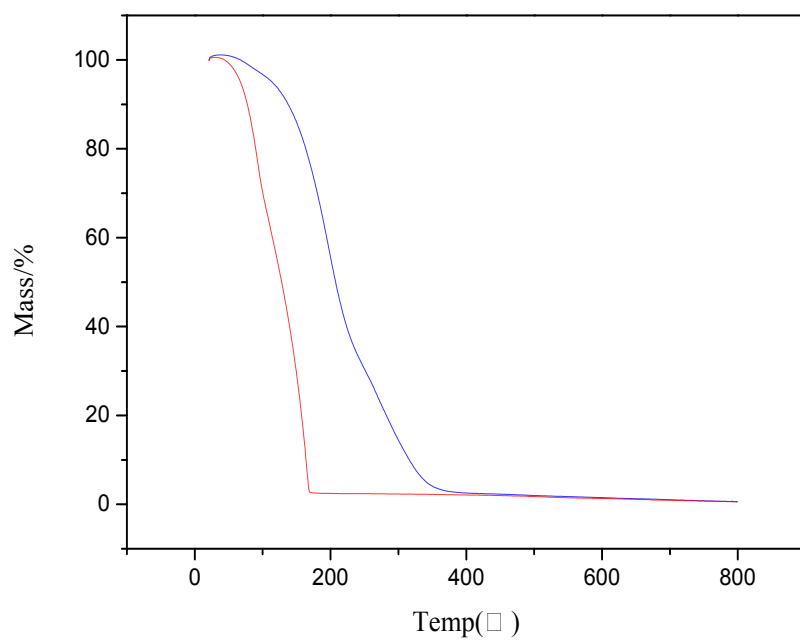

Figure S7. TG curves of the pure DTSMA and DTSMA/DSO solution with 60 wt% of DTSMA.

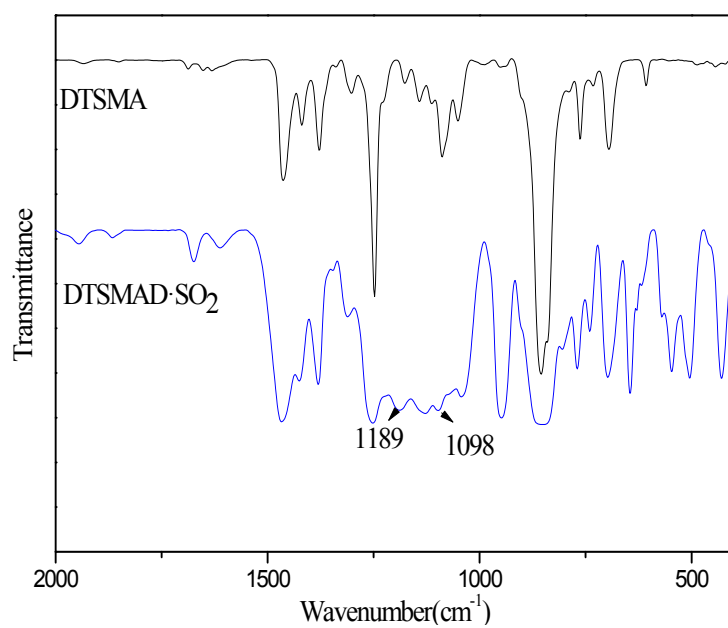

Figure S8. Infrared spectra of the DTSMA absorbent and the corresponding SO<sub>2</sub> absorption product.
